# Supplementary material for: An alphacoronavirus polymerase structure reveals conserved co-factor functions
Source: PubMed Central journal article supplement — bioRxiv. 2023 Mar 16:2023.03.15.532841. Preprint. [Version 1] doi: 10.1101/2023.03.15.532841 (PMC10055115; doi:10.1101/2023.03.15.532841), 2023-03-16
Supplement: media-1.pdf [file media-1.pdf]

|                                                     |                                     |
|-----------------------------------------------------|-------------------------------------|
| EMDB                                                | 29779                               |
| PDB                                                 | 8G6R                                |
| Microscope                                          | Talos Arctica                       |
| Voltage (kV)                                        | 200                                 |
| Detector                                            | K3 direct electron detector (Gatan) |
| Dose Rate (e <sup>-</sup> /pixel/sec)               | 12                                  |
| Exposure Time (sec)                                 | 3.5                                 |
| Electron Exposure (e <sup>-</sup> /Å <sup>2</sup> ) | 60                                  |
| Frames (no.)                                        | 60                                  |
| Defocus Values                                      | -0.7 to -2.5                        |
| Sample Tilt (°)                                     | 25                                  |
| Data Collection Mode                                | EFTEM, Counting, CDS                |
| Nominal Magnification                               | 105,000x                            |
| Pixel Size (Å)                                      | 0.834                               |
| Symmetry Imposed                                    | C1                                  |
| Movies Collected (no.)                              | 1,261                               |
| Initial Particle Images (no.)                       | 710,143                             |
| Final Particle Images (no.)                         | 74,367                              |
| Map Resolution (Å) – GSFSC                          | 3.3                                 |
| Initial Model Used (PDB ID)                         | 7CYQ                                |
| Non-hydrogen Atoms                                  | 9,410                               |
| Protein Residues                                    | 1075                                |
| Nucleic Acid Residues                               | 40                                  |
| R.M.S. Deviations                                   |                                     |
| Bond Lengths (Å)                                    | 0.004                               |
| Bond angles (°)                                     | 0.556                               |
| MolProbity Score                                    | 1.64                                |
| Clashscore                                          | 7.19                                |
| Ramachandran Plot                                   |                                     |
| Favored (%)                                         | 96.34                               |
| Allowed (%)                                         | 3.66                                |
| Disallowed (%)                                      | 0                                   |

**Table S1: cryo-EM data collection and refinement.** Information provided is for the cryo-EM data collection, and processing that produced the electron density map of the PEDV polymerase complex. Additionally, validation statistics for the polymerase complex coordinate model built into the reconstruction are provided.

| Sample                     | Desolvation Parameters     |                        |
|----------------------------|----------------------------|------------------------|
|                            | Capillary Temperature (°C) | In-source Trapping (V) |
| PEDV nsp12+8+7             | 250                        | -150                   |
| PEDV A382R-nsp12+8+7       | 200                        | -300                   |
| PEDV V848R-nsp12+8+7       | 200                        | -200                   |
| PEDV nsp12+8+8L7           | 250                        | -300                   |
| SARS-CoV-2 nsp12+8+7       | 200                        | -150                   |
| SARS-CoV-2 L387R-nsp12+8+7 | 200                        | -150                   |
| SARS-CoV-2 T853R-nsp12+8+7 | 200                        | -160                   |
| SARS-CoV-2 nsp12+8+8L7     | 250                        | -150                   |

**Table S2, native mass spectrometry desolvation parameters:** Parameters listed were optimized for each sample to remove as many adducts as possible without disrupting the complex(es) of interest.

**Supplemental video 1, 3D variability analysis of PEDV core complex:** The movie displays a series of 3D volumes (in gray) determined by 3D variability analysis (cryoSPARC v3.3.1). The movie begins by oscillating between the extremes of variability within the volume series. Docking our PEDV core complex model (nsp12 – light purple, nsp7 – green, nsp8 – red, primer – neon green, template – dark purple) into the densities reveals the flexibility of dsRNA leaving the active site. We predict that this movement results in the lack of complete reconstruction of our dsRNA and nsp8<sub>1</sub> N-terminal extension in our final map and model.

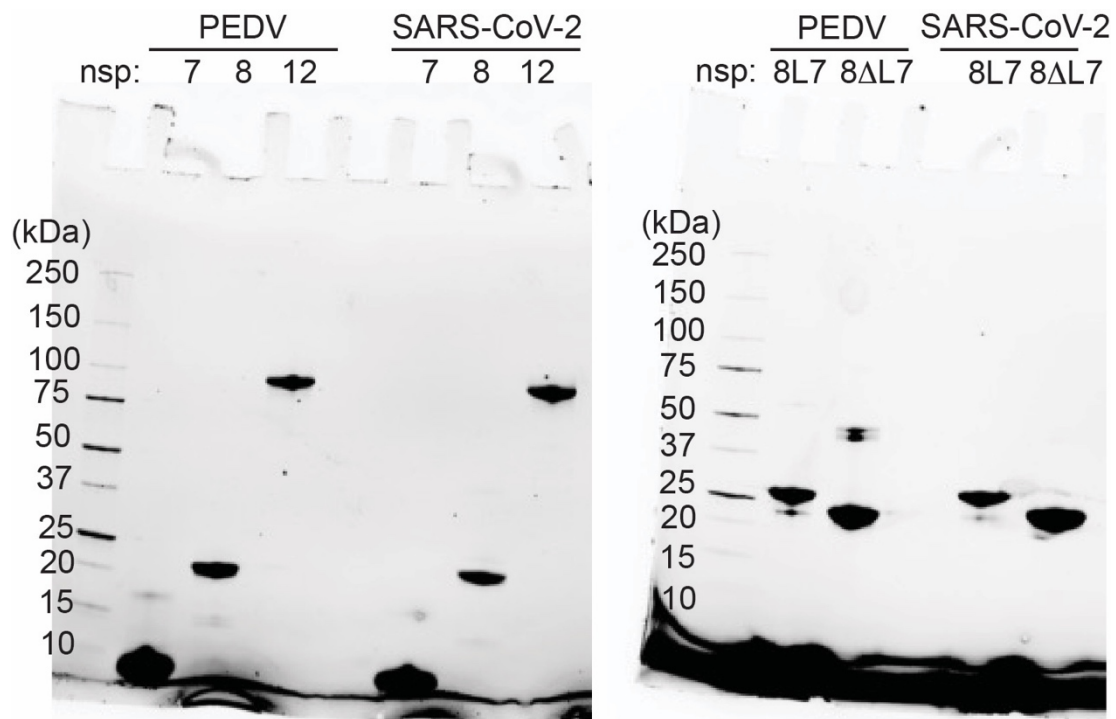

**Figure S1, SDS-PAGE of viral proteins:** Samples of purified proteins used for *in vitro* studies were run on pre-cast, stain-free, 4-20% SDS-PAGE gels (BioRad) and imaged using UV fluorescence. Expected molecular weights for different proteins are nsp7 – 9 kDa, nsp8 – 22 kDa, nsp12 – 110 kDa, nsp8L7 – 31 kDa, and nsp8ΔL7 – 25 kDa. The far-left lane of each gel is a protein ladder protein MWs labeled.

A

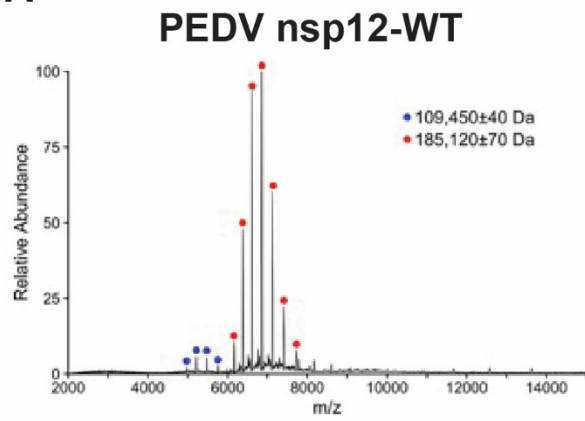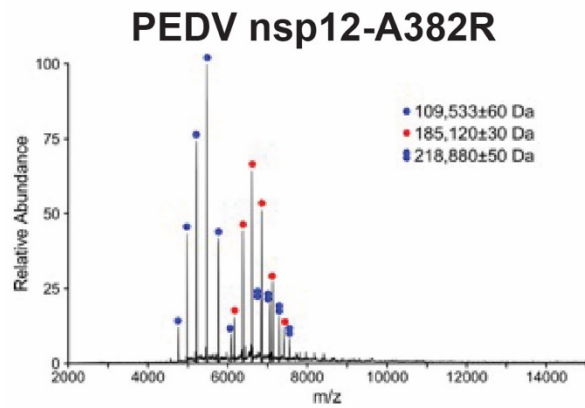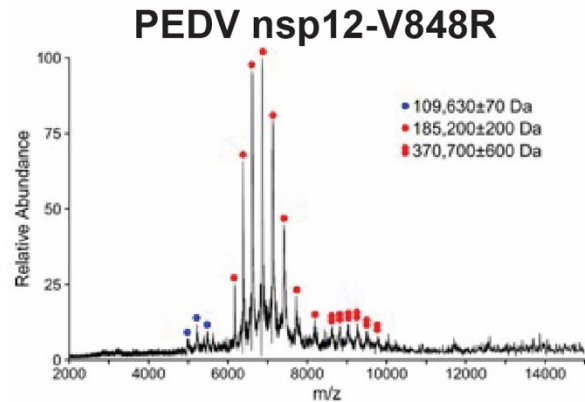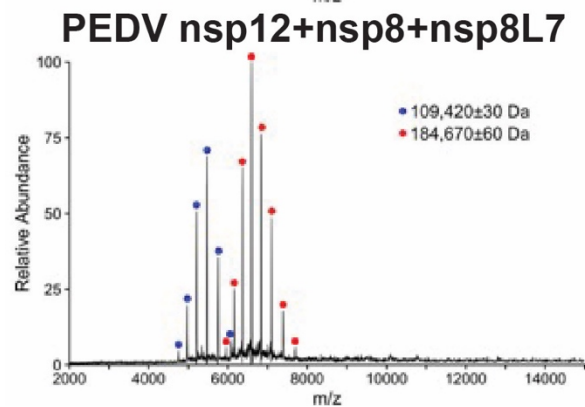

B

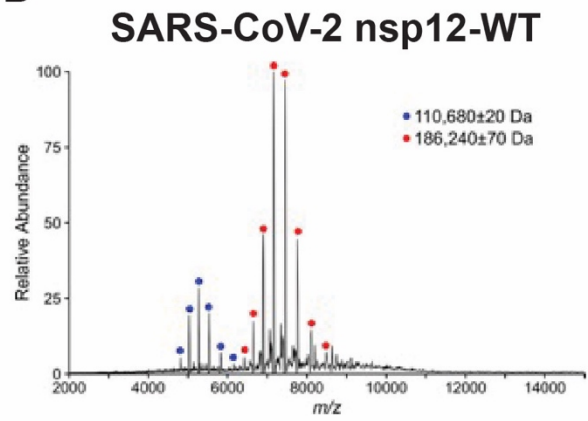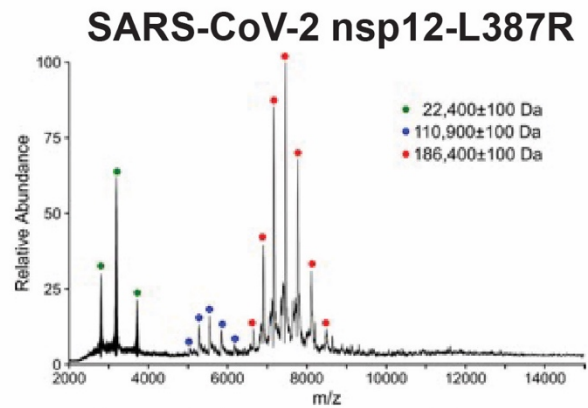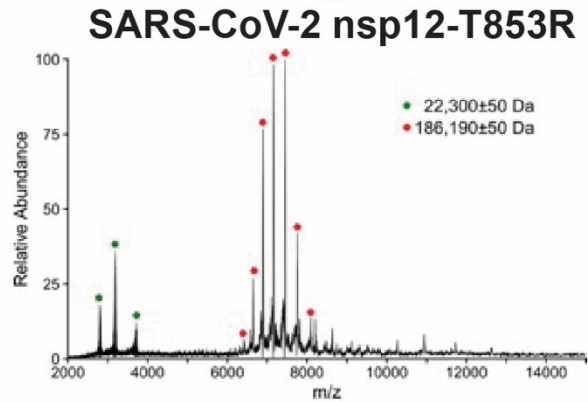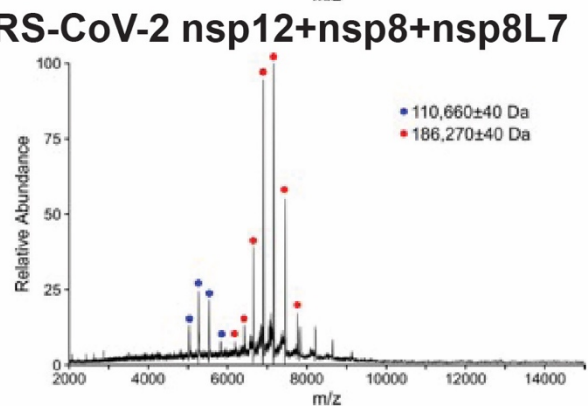

**Figure S2, native mass spectrometry of coronavirus polymerase complexes.** Native mass spectra for all coronavirus polymerase complexes tested with major mass populations labelled for each. Single and double red dots are monomeric and dimeric full intact complexes, respectively. Single and double blue dots are monomeric and dimeric solo nsp12, respectively. Green dots are free nsp8. **A)** SARS-CoV-2 complexes, top to

bottom: wildtype, L387R, T853R, nsp8L7. **B)** PEDV complexes, top to bottom: wildtype, A382R, V848R, nsp8L7.

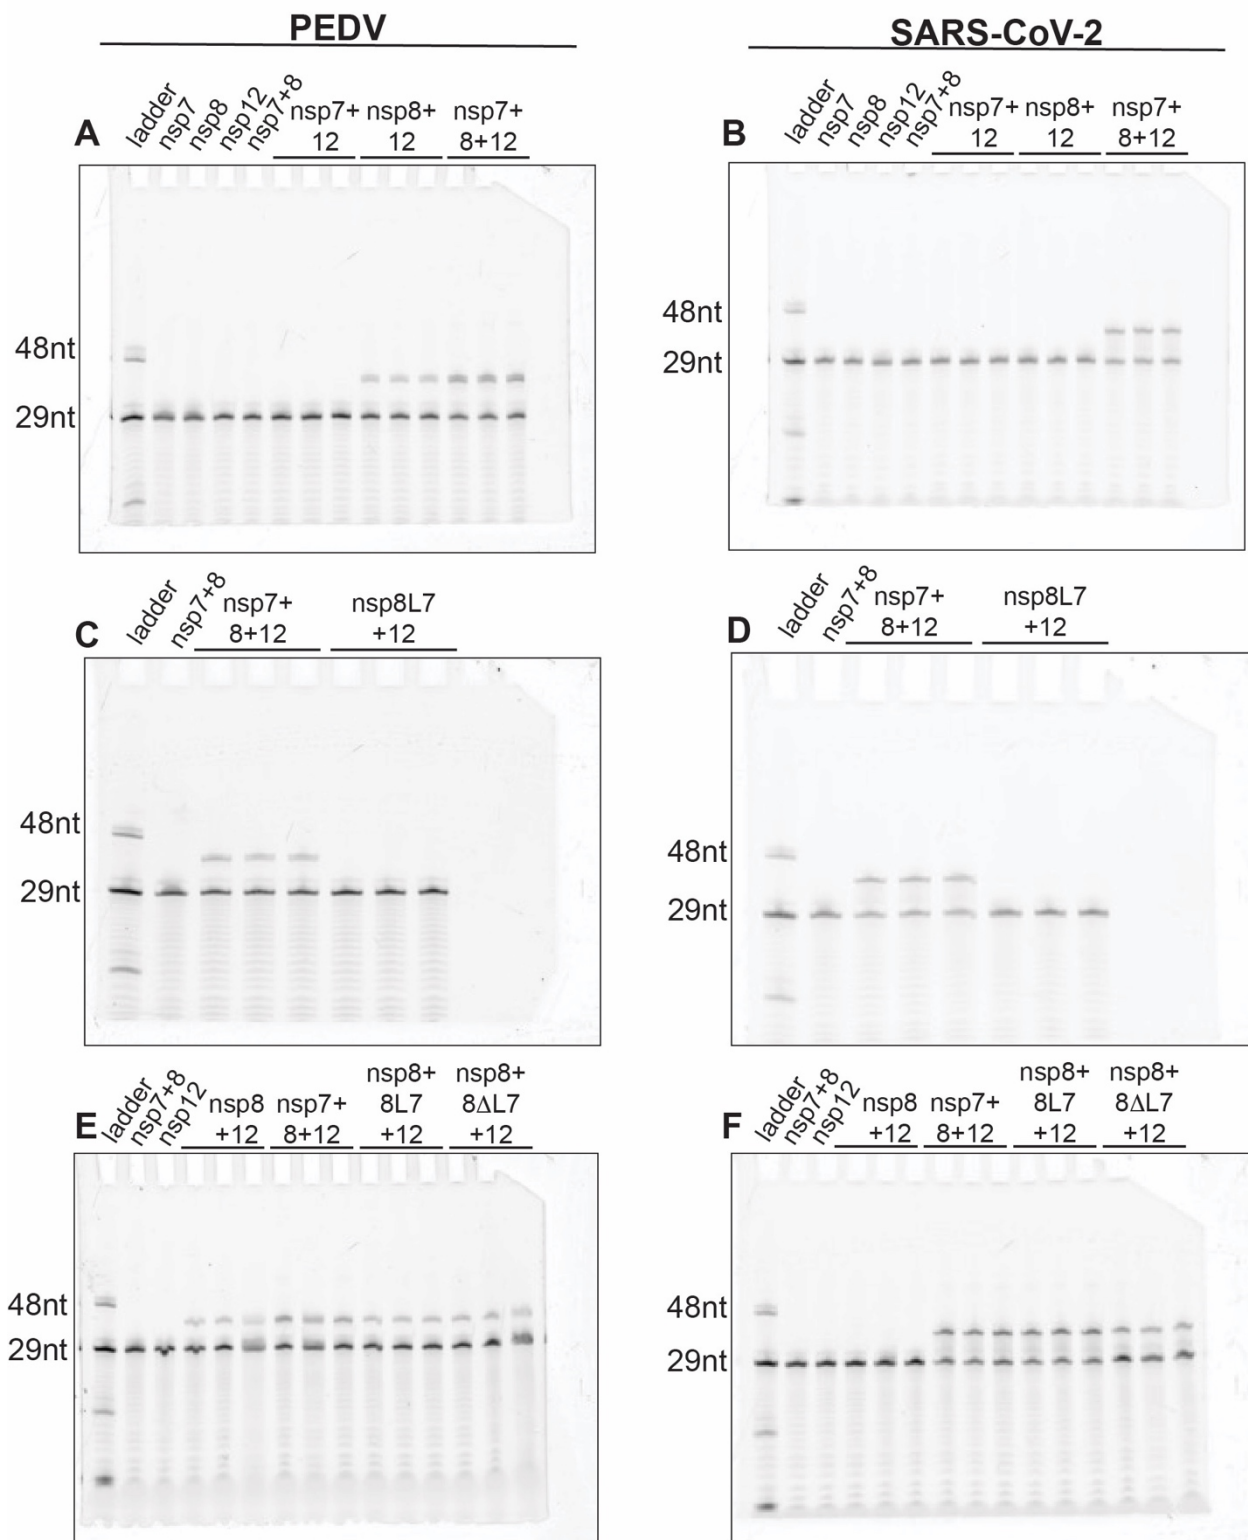

**Figure S3, full gel images for piecewise and fusion protein primer extensions:** Primer extensions assess the activity of nsp12 by its ability to extend an RNA primer (29 nucleotides or nt) to the length of its RNA template (38 nt) pair. **A)** PEDV piecewise primer extension revealing optimal nsp12 activity in the presence of both nsp7 and nsp8, and reduced activity with just nsp8. **B)** SARS2 piecewise primer extensions showing nsp12 is only active in the presence of both cofactors. Nsp8L7 does not individually activate nsp12 (**C** is PEDV, **D** is SARS-CoV-2). Nsp8L7 and nsp8ΔL7 activate nsp12 with free nsp8 present (**E** is PEDV, **F** is SARS-CoV-2), indicating polymerase activities requirement for nsp8<sub>1</sub>, while nsp8<sub>2</sub>'s helical extension is not essential for activity.

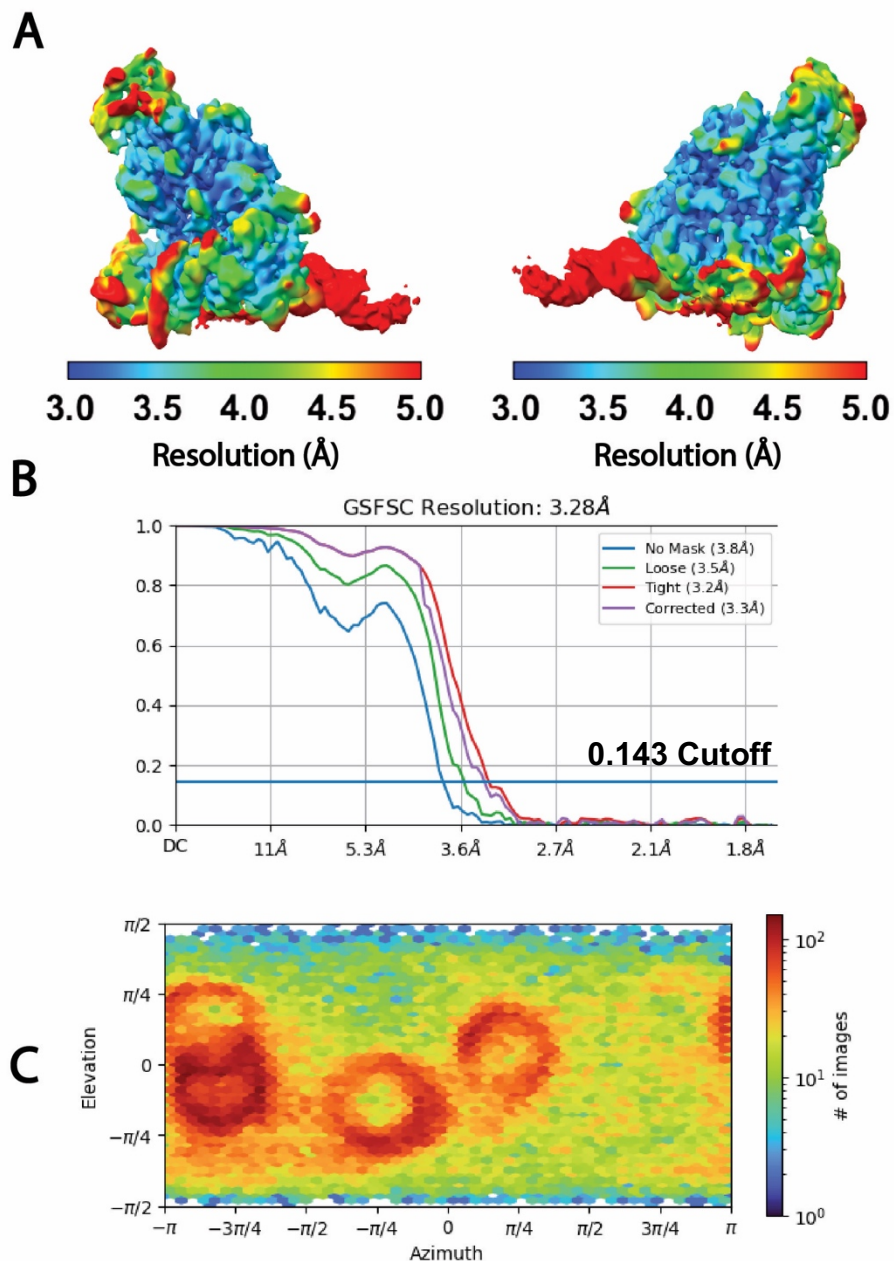

**Figure S4, cryo-EM validation:** A) Cryo-EM reconstruction filtered by local resolution according to the color key. B) Gold-standard Fourier shell correlation plot determined in cryoSPARC. The solid blue line marks the 0.143 cutoff. C) Particle orientation distribution plot for the final reconstruction. “# of images” indicates number of projections at a particular orientation (Elevation x Azimuth).

|                   |                                                               |                                                                |    |
|-------------------|---------------------------------------------------------------|----------------------------------------------------------------|----|
| δ                 | HKU19                                                         | -LGYSSNQNNSYLNRVKGSS-DARLEPCTSDNRDPDVVVRAFN IYNN--ATAGIFKSTKNN | 56 |
|                   | HKU11                                                         | -----NSPYLNRVTGSS-GARLEPQQPGVTPDAVKRAFHVHNN--TTSIGIFLSTKTN     | 49 |
| α                 | PDCV                                                          | -----NSAYLNRVTGSS-DARLEPLQPGTQPDVAVKRAFHVHND--TTSIGIFLSTKSN    | 49 |
|                   | FCoV_65F                                                      | ----GTTVDQSYLNRVKGSS-AARLEPCN-GTDPDHVSRAFDIYNK--DVACIGKFLKTN   | 52 |
|                   | HCoV_229E                                                     | -----SFDSSYLNRVKGSS-AARLEPCN-GTDIDYCVRAFVYVYK--DASFIGNKLKSN    | 50 |
|                   | HCoV_NL63                                                     | -----SVDISYLNRARGSS-AARLEPCN-GTDIDKCVRAFDIYNK--NVSFGLGCKLMN    | 50 |
|                   | HKU8                                                          | -----SLDNNYLNRVKGSS-AARLEPCN-GTEPEHVIRAFDIYNK--DVACIGKVFVKVN   | 50 |
| γ                 | <b>PEDV</b>                                                   | -----STDMAYLNRVKGSS-AARLEXCN-GTDTQHVVYRAFDIYNK--DVACLKGLFKVN   | 50 |
|                   | HKU22                                                         | -----SVPQNYLNRVGRGLS-EARLRPCASGLLPDVVVKRAFVLYNS--NTAGMYASLKHN  | 51 |
|                   | IBV                                                           | SVAVASGFDKNYLNRVKGSS-EARLIPLANGCDPDVVVKRAFVVCNK--ESAGMFQNLKRN  | 57 |
|                   | HCoV_OC43                                                     | -----SKDTNFLNRVGRGASVDARLVPCASGLSTDVQLRAFDIYNA--SVAGIGLHLKVN   | 52 |
|                   | HCoV_HKU1                                                     | -----SKDLNFLNRVGRGTSVNARLVPCASGLSTDVQLRAFDIYNA--NRAGIGLYYKVN   | 52 |
| β                 | MHV                                                           | -----SKDTNFLNRVGRGTSVNARLVPCASGLSTDVQLRAFDIYNA--NRAGIGLYYKVN   | 52 |
|                   | MERS                                                          | -----SKDSNFLNRVGRGSIVNARIEPCSSGLSTDVVFRAFDIYNA--KAVAGIGKYYKTN  | 54 |
|                   | HKU4                                                          | -----SKDTNFLNRVGRGSSVNARLEPCSSGLTDDVVYRAFDIYNA--KAVAGIGKYYKTN  | 54 |
|                   | HKU5                                                          | -----SKDSNFLNRVGRGSIVNARIEPCASGLTDDVVYRAFDIYNA--KAVAGIGKYYKTN  | 54 |
|                   | HKU9                                                          | -----AKDECFNLRVGRGTSVVARLVPLGSGVQPDIVLRAFDIYNA--KAVAGIGLHLKNN  | 52 |
| <b>SARS-CoV-2</b> | -----SADAQSFLNRVCGVS-AARLTPCGTGTSTDDVVYRAFDIYND--KVAGFAKFLKTN | 52                                                             |    |
| SARS-CoV          | -----SADASTFLNRVCGVS-AARLTPCGTGTSTDDVVYRAFDIYNE--KVAGFAKFLKTN | 52                                                             |    |
|                   |                                                               | :***. * ** : . : ***. : * : : * *                              |    |

|                   |                                                           |                                                              |     |
|-------------------|-----------------------------------------------------------|--------------------------------------------------------------|-----|
| δ                 | HKU19                                                     | CTRFKSTRPGSI INKPVRTIETFFVTKQCTENVFRAEEQCYNMLPKSIVSTDDKFCVAV | 116 |
|                   | HKU11                                                     | CSRFRRTKQNLPLP-NKGSVELYFVSKQCSQQVFEIEETCYNMFDDSLKSTPEKFGVLAR | 108 |
| α                 | PDCV                                                      | CARFKTTRSALPLP-NKGEVELYFVTKQCAAKVFEIEEBCYNMSTELYTDDTFGVLAK   | 108 |
|                   | FCoV_65F                                                  | CSRFRNLD-----KRDAYVVKRCKTSKVMDEHQVCYNDLKD-----SGAVAE         | 94  |
|                   | HCoV_229E                                                 | CVRFKNVD-----KDDAFYIVKRCIKSVMDEHQSMYLLKG-----CNAVAK          | 92  |
|                   | HCoV_NL63                                                 | CVRFKNAD-----LKDGYFVVKRCKTSKVMDEHQSMYLLNF-----SGALAE         | 92  |
|                   | HKU8                                                      | CVRFKNAD-----KHDAFYVVKRCKTSKVMDEHQSIYDALKD-----CGAVSP        | 92  |
| γ                 | <b>PEDV</b>                                               | CVRDLKND-----KHDAFYVVKRCKTSKVMDEHQSIYSRLEK-----CGAVAE        | 92  |
|                   | HKU22                                                     | CARFQELDENDD-----EIDSFVVKQTPPHNFEHEEKCYLDLKA-----DCVAV       | 96  |
|                   | IBV                                                       | CARFQEVDRDTEG--GNLEYCDSYFVVKQTPPSNYEHEKACYEDLKS-----EVTAD    | 106 |
|                   | HCoV_OC43                                                 | CCRFQQRVDENGD-----KLDQFFVVKRCKTDLTYNREMKCYERVKD-----CKFVAE   | 98  |
|                   | HCoV_HKU1                                                 | CCRFQRIDDDGN-----KLDKFFVVKRCKTDLTYNREMKCYERVKD-----CGVVAE    | 98  |
| β                 | MHV                                                       | CCRFQQRVDEEGN-----KLDKFFVVKRCKTDLTYNREMKCYERVKD-----CGVVAE   | 98  |
|                   | MERS                                                      | TCRFVQLDDQGH-----HLDSYFVVKRCKTDLTYNREMKCYERVKD-----CDAVAP    | 100 |
|                   | HKU4                                                      | TCRFVQVDDDEGH-----KLDYFVVKRCKTDLTYNREMKCYERVKD-----CDAVAI    | 100 |
|                   | HKU5                                                      | TCRFVVEVDDDEGH-----RLDSYFVVKRCKTDLTYNREMKCYERVKD-----CDAVAV  | 100 |
|                   | HKU9                                                      | CCRYQELDADGN-----QLDSYFVVKRCKTDLTYNREMKCYERVKD-----CDVVAR    | 98  |
| <b>SARS-CoV-2</b> | CCRFQEKDEDDN-----LIDSYFVVKRCKTDLTYNREMKCYERVKD-----CPAVAK | 98                                                           |     |
| SARS-CoV          | CCRFQEKDEEGN-----LLDSYFVVKRCKTDLTYNREMKCYERVKD-----CPAVAV | 98                                                           |     |
|                   |                                                           | * : : : * : * * :                                            |     |

NiRAN  
Motif A<sub>N</sub>

|                   |                                                              |                                                              |     |
|-------------------|--------------------------------------------------------------|--------------------------------------------------------------|-----|
| δ                 | HKU19                                                        | HDFKFDG---VNNVRRHLTKYTLDDLVAALRHLSTS-QEIQEILITMCGTSEE---     | 168 |
|                   | HKU11                                                        | TEFFKFDK---IPNVNRQFLTKYTLDDLVAALRHLSTS-RDVIKEILITICGTTEE---  | 160 |
| α                 | PDCV                                                         | TEFFKFDK---IPNVNRQYLTKYTLDDLVAALRHLSTS-KDVIQEILITMCGTPED---  | 160 |
|                   | FCoV_65F                                                     | HDFFLYKEGRCEFGNVARKDLTKYTMDLVCYALRNFDKNCCEVLKEILVTLGACNES--- | 151 |
|                   | HCoV_229E                                                    | HDFFTWHEGRTIYGNVSRQDLTKYTMDLVCYALRNFDKNCCEVLKEILVTLGACNTD--- | 149 |
|                   | HCoV_NL63                                                    | HDFFTWKDGRVIYGNVSRHNLTKYTMDLVCYALRNFDKNCCEVLKEILVTLGACDNS--- | 149 |
|                   | HKU8                                                         | HDFVVKDGRSVYGNVSRHNLTKYTMDLVCYALRNFDKNCCEVLKEILVTLGACDSS---  | 149 |
| γ                 | <b>PEDV</b>                                                  | HDFFTWKDGRAIYGNVCRKDLTKYTMDLVCYALRNFDKNCCEVLKEILVTLGACDES--- | 149 |
|                   | HKU22                                                        | HDFFRFE-G---MYNICRQRLTKYTMDLVCYALRNFDKNCCEVLKEILVTKGCEWD---  | 149 |
|                   | IBV                                                          | HDFVFNKN---IYNISRQRLTKYTMDLVCYALRNFDKNCCEVLKEILVTKGCEWD---   | 163 |
|                   | HCoV_OC43                                                    | HDFFTFDVGRVPHIVRQDLTKYTMDLVCYALRNFDKNCCEVLKEILVTKGCEWD---    | 155 |
|                   | HCoV_HKU1                                                    | HDFFTFDVGRVPHIVRQDLTKYTMDLVCYALRNFDKNCCEVLKEILVTKGCEWD---    | 155 |
| β                 | MHV                                                          | HEFFTFDVEGRVPHIVRQDLTKYTMDLVCYALRNFDKNCCEVLKEILVTKGCEWD---   | 155 |
|                   | MERS                                                         | HDFFIQVVKVTPHIVRQDLTKYTMDLVCYALRNFDKNCCEVLKEILVTKGCEWD---    | 156 |
|                   | HKU4                                                         | HDFFIQVVKVTPHIVRQDLTKYTMDLVCYALRNFDKNCCEVLKEILVTKGCEWD---    | 157 |
|                   | HKU5                                                         | HDFFIQVVKVTPHIVRQDLTKYTMDLVCYALRNFDKNCCEVLKEILVTKGCEWD---    | 157 |
|                   | HKU9                                                         | HDFFKFNIQVVKVTPHIVRQDLTKYTMDLVCYALRNFDKNCCEVLKEILVTKGCEWD--- | 155 |
| <b>SARS-CoV-2</b> | HDFFKFRIDGDMVPHIVRQDLTKYTMDLVCYALRNFDKNCCEVLKEILVTKGCEWD---  | 155                                                          |     |
| SARS-CoV          | HDFFKFRVVDGDMVPHIVRQDLTKYTMDLVCYALRNFDKNCCEVLKEILVTKGCEWD--- | 155                                                          |     |
|                   |                                                              | :** : : : * . * : : * : * : : * : : * : : * :                |     |

NiRAN  
Motif B<sub>N</sub>









|            |                                                             |                                                                |     |                                  |
|------------|-------------------------------------------------------------|----------------------------------------------------------------|-----|----------------------------------|
| δ          | HKU19                                                       | FNLLQVVSANARFMSTSAATHHDVDMHLHRQIYDDIYRGSNDSVAIQSFYEHLQKYF      | 760 | Polymerase<br>Motif B<br>Motif C |
|            | HKU11                                                       | FNLLQVVSANVATFLSTSTSSSHNSREIADLHRNLYEDIYRGSNNTTIIDQFYQHLQKYF   | 751 |                                  |
| α          | PDCV                                                        | FNLLQVVSANVATFLSTSTTHLNKDIADLHRSLYEDIYRGSNDITVINRFYQHLQSYF     | 751 |                                  |
|            | FCoV_65F                                                    | FNIFQAVSANVNKLLGVDSTNCNNVTVKSIQRKIYDNCYRSSVDDDFVVEYFYSYLRKHF   | 750 |                                  |
|            | HCoV_229E                                                   | FNIFQAVSNINCVLSVNSNCNNFNVKLQRLYDNCYRNSVDESFDVDFYGYLQKHF        | 748 |                                  |
|            | HCoV_NL63                                                   | FNIFQAVSNINRLLSVPDSDCNNVNRDLQRRLYDNCYRLTSVEESFIDDDYGYLRKHF     | 748 |                                  |
| γ          | HKU8                                                        | FNIFQAVSANINRILGINSNTCNNLAVKSLQRMLYDNCYRSSAVDPGFVDTFYGYLRKHF   | 748 |                                  |
|            | PEDEV                                                       | FNIFQAVSANVNKLLSVDSNVCHNLEVKLQRLYECCYRSTTVDDQFVVEYGYLRKHF      | 748 |                                  |
|            | HKU22                                                       | FNLFQATAANVAQLLATPTSRIYVEEVRALQHELYTQVYRRDKPDMDFVYTFYAYLNKHF   | 747 |                                  |
|            | IBV                                                         | FNIIQATSANVARLLSVITRDIVYDDIKSLQYELYQQVYRRVNDPAPFVEKFYSYLCCKNF  | 761 |                                  |
| β          | HCoV_OC43                                                   | FNICQAVSANVCALMSCNGNKIEDLSIRALQKRLYSHVYRSDKVDSTFVTEYEFYFLNKHF  | 749 |                                  |
|            | HCoV_HKU1                                                   | FNICQAVTANVCSLMACNGHKIEDLSIRNLQKRLYSNVYRDTDYVDYTFVNEYEFYFLCKHF | 749 |                                  |
|            | MHV                                                         | FNICQAVSANVCSLMACNGHKIEDLSIRELQKRLYSNVYRADHVDPAFVSEYEFYFLNKHF  | 749 |                                  |
|            | MERS                                                        | FNILQATTANVSALMGANGNKIVDKEVKDMQFDLYVNVYRSTSDPKFVVKYAFYFLNKHF   | 754 |                                  |
|            | HKU4                                                        | FNILQATTANVSALMSANGNTIIDREIKDMQFDLYINVYRKYVDPKPFVVKYAFYFLNKHF  | 755 |                                  |
|            | HKU5                                                        | FNILQATTANVSALMGANGNTIVDEEVKDMQFELYVNVYRKSQDPKPFVDRYAFYFLNKHF  | 755 |                                  |
| HKU9       | FNICQAVSANLNTFLSVDGNKIYTTYVQELQRRLYLGIYRSTVNDLVLVDYNYLRKHF  | 753                                                            |     |                                  |
| SARS-CoV-2 | FNICQAVTANVNALLSTDGNKIADKYVRNLQHRLYECLYRNRDVTDFVNEFYAYLRKHF | 753                                                            |     |                                  |
| SARS-CoV   | FNICQAVTANVNALLSTDGNKIADKYVRNLQHRLYECLYRNRDVEHFVDFEYAYLRKHF | 753                                                            |     |                                  |
|            |                                                             | ***: *...*: .. : : : * * : : : * . *                           |     |                                  |

|            |                                                              |                                                                       |     |                                             |
|------------|--------------------------------------------------------------|-----------------------------------------------------------------------|-----|---------------------------------------------|
| δ          | HKU19                                                        | GLMILSDDGVACIDQEAARKQGMVADLDDFRDVLFYQNNVYMSISKWLETDMSKGPHFEC          | 820 | Polymerase<br>Motif C<br>Motif D<br>Motif E |
|            | HKU11                                                        | GLMILSDDGVACIDTEAAASGVVSNLDGFRDILFYQNNVYMSISKWLETDMTVPKPHFEC          | 811 |                                             |
| α          | PDCV                                                         | GLMILSDDGVACIDSAAKAGAVADLDGFRDILFYQNNVYMSISKWLETDMNVGPHFEC            | 811 |                                             |
|            | FCoV_65F                                                     | SMMILSDDGVVCYNKDYADLGYVADISAFKATLYQNNVFMSTAKCWPEPLNVGPHFEC            | 810 |                                             |
|            | HCoV_229E                                                    | SMMILSDDGVVCYNKTYAELGYIADISAFKATLYQNGVFMSTAKCWTEEDLSIGPHFEC           | 808 |                                             |
|            | HCoV_NL63                                                    | SMMILSDDGVVCYNKDYAELGYIADISAFKATLYQNNVFMSTAKCWVEEDLTKGPHFEC           | 808 |                                             |
| γ          | HKU8                                                         | SMMILSDDGVVCYNKEYASLGYVADINAFKATLYQNNVFMSTAKCWVEEDLTKGPHFEC           | 808 |                                             |
|            | PEDEV                                                        | SMMILSDDGVVCYNNDYASLGYVADLNAFKAVLYQNNVFMSEAKCWIEPDINKGPHFEC           | 808 |                                             |
|            | HKU22                                                        | SLMILSDDGVVCYNSDYAEGMVASIASFREVLFYQNNVFMADSKCWTEEDVKGPHFEC            | 807 |                                             |
|            | IBV                                                          | SLMILSDDGVVCYNNTLAKQGLVADISGFREVLYQNNVFMADSKCWPEPDLEKGPHEFC           | 821 |                                             |
| β          | HCoV_OC43                                                    | SMMILSDDGVVCYNSDYASKGYIANISAFQVLYQNNVFMSESKCWVEHDINNGPHFEC            | 809 |                                             |
|            | HCoV_HKU1                                                    | SMMILSDDGVVCYNSDYASKGYIANISVFFQVLYQNNVFMSESKCWVENDITNGPHFEC           | 809 |                                             |
|            | MHV                                                          | SMMILSDDGVVCYNSEFASKGYIANISAFQVLYQNNVFMSEAKCWVETDIEKGPHEFC            | 809 |                                             |
|            | MERS                                                         | SMMILSDDGVVCYNSDYAAKGYIAGIQNFKETLYQNNVFMSEAKCWVETDLKKGPHFEC           | 814 |                                             |
|            | HKU4                                                         | SMMILSDDGVVCYNSDYAAKGYVASIQNFKETLYQNNVFMSEAKCWVETNLEKGPHEFC           | 815 |                                             |
|            | HKU5                                                         | SMMILSDDGVVCYNSDYATKGYIASIQNFKETLYQNNVFMSEAKCWVETDLKKGPHFEC           | 815 |                                             |
| HKU9       | SMMILSDDGVVCYNADYAQKGYVADIQGFKELLYQNNVFMSESKCWPEPDKGPHFEC    | 813                                                                   |     |                                             |
| SARS-CoV-2 | SMMILSDDAVVCFNSTYASQGLVASIKNFKSVLYQNNVFMSEAKCWETDLDLTKGPHFEC | 813                                                                   |     |                                             |
| SARS-CoV   | SMMILSDDAVVCYNRYAAQGLVASIKNFKAVLYQNNVFMSEAKCWETDLDLTKGPHFEC  | 813                                                                   |     |                                             |
|            |                                                              | .:*****.*.* : * * : : : * : * : * : * : * : * : * : * : * : * : * : * |     |                                             |

|            |                                                              |                                                               |     |                       |
|------------|--------------------------------------------------------------|---------------------------------------------------------------|-----|-----------------------|
| δ          | HKU19                                                        | SQHTVLAEYDGEPCYYPYDPVSRILGACIFVNETEKTDVPQNLERYSISLAIDAYPLTKVD | 880 | Polymerase<br>Motif E |
|            | HKU11                                                        | SQHTVLAEHGKPYLYPYDPVSRILGACIFVDDVNKADPIQNLERYSISLAIDAYPLTKVD  | 871 |                       |
| α          | PDCV                                                         | SQHTVLAHDGKPYLYPYDPVSRILGACIFVDDVNKADVPQNLERYSISLAIDAYPLTKVD  | 871 |                       |
|            | FCoV_65F                                                     | SQHTLQIVGADGYLYPYDPDSRILSAGVFVDDIVKTDNVMILERYVSLAIDAYPLTKHP   | 870 |                       |
|            | HCoV_229E                                                    | SQHTMQIVDENGKYYLYPYDPDSRIISAGVFVDDVKTDAVILLERYVSLAIDAYPLSKHP  | 868 |                       |
|            | HCoV_NL63                                                    | SQHTMQIVDKDGTYYLYPYDPDSRILSAGVFVDDVKTDAVLLERYVSLAIDAYPLSKHP   | 868 |                       |
| γ          | HKU8                                                         | SQHTMQIVDGDGTYYLYPYDPDSRILSAGVFVDDVKTDAVLLERYVSLAIDAYPLSKHP   | 868 |                       |
|            | PEDEV                                                        | SQHTMQIVDKDGTYYLYPYDPDSRILSAGVFVDDVKTDAVLLERYVSLAIDAYPLSKHE   | 868 |                       |
|            | HKU22                                                        | SQHTMLVEIDGEMRYLYPYDPDSRILGACVFVDDVEKTEPVVMERYVALAIDAYPLIYHE  | 867 |                       |
|            | IBV                                                          | SQHTMLVEVDGEPYLYPYDPDSRILCACVFVDDLDKTESVAVMERYIALAIDAYPLVHHE  | 881 |                       |
| β          | HCoV_OC43                                                    | SQHTMLVKMDGDDVLYPYPNPSRILGACCFVDDLLKTDVLLIERFVSLAIDAYPLVYHE   | 869 |                       |
|            | HCoV_HKU1                                                    | SQHTMLVKIDGDDVLYPYPNPSRILGACCFVDDLLKTDVLLIERFVSLAIDAYPLVYHE   | 869 |                       |
|            | MHV                                                          | SQHTMLVKMDGDEVLYPYPNPSRILGACCFVDDLLKTDVLLIERFVSLAIDAYPLVYHE   | 869 |                       |
|            | MERS                                                         | SQHTLYIKDGDGDFLYPYPNPSRILSAGCFVDDIVKTDGTLMVERFVSLAIDAYPLTKHE  | 874 |                       |
|            | HKU4                                                         | SQHTLYIKDGDGDFLYPYPNPSRILSAGCFVDDIVKTDGTMVMERYVSLAIDAYPLTKHD  | 875 |                       |
|            | HKU5                                                         | SQHTLFIKDDGDFLYPYPNPSRILSAGCFVDDIVKTDGTLMVERFVSLAIDAYPLTKHD   | 875 |                       |
| HKU9       | SQHTMLVEMNGEKVLYPYPNPSRILGACCFVDDLLKTDGTLMMERYVSLAIDAYPLTKHA | 873                                                           |     |                       |
| SARS-CoV-2 | SQHTMLVKQGGDDVLYPYPNPSRILGACCFVDDIVKTDGTLMIERFVSLAIDAYPLTKHP | 873                                                           |     |                       |
| SARS-CoV   | SQHTMLVKQGGDDVLYPYPNPSRILGACCFVDDIVKTDGTLMIERFVSLAIDAYPLTKHP | 873                                                           |     |                       |
|            |                                                              | ***: : . : ***: ***: * **:: *:: :***::*****                   |     |                       |

|          |                                                                 |                                                                  |     |            |
|----------|-----------------------------------------------------------------|------------------------------------------------------------------|-----|------------|
| δ        | HKU19                                                           | -NKKGKVFYVLLDYIRKLANELQEGIMDAFQTSTDTSYINNFTENFYSDMYAKAPVLQ       | 938 |            |
|          | HKU11                                                           | -PIKGGVFYVLLLDYIRILAQELQDGI LDTFQSM TDMSYVNNFVQEA FYAQMYEQSP TLQ | 929 |            |
|          | PDCV                                                            | -PIKGGVFYVLLLDYIRVLAQELQDGI LDTFQSM TDMSYVNNFVQEA FYAQMYEQSP TLQ | 929 |            |
| α        | FCoV_65F                                                        | KPAYQKVFYALLDQVVKHLQKTLNAGI LDFS SVT MLEDGQDKFWSEEFYASLYEKSTVLQ  | 929 |            |
|          | HCoV_229E                                                       | KPEYRKVFYALLDQVVKHLNKT LNEGVL ESFSVTLLDEQESKFWDES FYASMYEKSTVLQ  | 927 |            |
|          | HCoV_NL63                                                       | NSEYRKVFYVLLDQVVKHLNKNLNEGVL ESFSVTLLDNQEDKFWCEDFYASMYENSTILQ    | 927 |            |
|          | HKU8                                                            | NPEYRKVFYVLLDQVVKHLNNTLNQGVLESFSVTLL EDASSKFWDES FYANLYEKSAVLQ   | 927 | PEDV nsp12 |
|          | PEDV                                                            | NPEYKVFYVLLDQVVKHLYKTLNAGVLESFSVTLL EDSTAKFWDES FYANMYEKSAVLQ    | 927 | V894       |
| γ        | HKU22                                                           | NEEYKVFYVLLSYIQTLYQR LSNM LMDYSFVMNIDTSSKFWEEDFYRQMYESSPTLQ      | 926 |            |
|          | IBV                                                             | NEEYKVFYVLLSYIRKLYQEL SQNMLMDYSFVMIDIRGSKFWEEQEFYENMYRAPPTLQ     | 940 |            |
|          | HCoV_OC43                                                       | NEEYKVFYVLLSYIKKLYNDLGNQILDSYSVILSTCDGQKFTDES FYKMYLRSAVMQ       | 928 |            |
| β        | HCoV_HKU1                                                       | NEEYKVFYVLLSYIKKLYNDLGTQILDSYSVILSTCDGLKFTDES FYKMYLRSAVMQ       | 928 |            |
|          | MHV                                                             | NPEYQNVFRVLYEYIKKLYNDLGNQILDSYSVILSTCDGQKFTDETFYKMYLRSAVLQ       | 928 |            |
|          | MERS                                                            | DIEYQNVFVWVLYQYIEKLYKDLTG HMLDSYSVMLCGDNSAKFWEEAFYRDLYSSPTTLQ    | 933 |            |
|          | HKU4                                                            | DTEYQNVFVWVLYQYIEKLYKDLTG HMLDSYSVMLCGDSSAKFWEEGFYRDLYSSPTTLQ    | 934 |            |
|          | HKU5                                                            | DPEYQNVFVWVLYQYIEKLYKDLTG HMLDSYSVMLCGDNSAKFWEEAFYRDLYTAPTTLQ    | 934 |            |
|          | HKU9                                                            | DPEYQNVFVWVLYQYIKKLEELTG HLLDTSVMLASDNASKYWEVDFYENMYMESATLQ      | 932 |            |
|          | SARS-CoV-2                                                      | NQEYADV FHLYLQYIRKLHDEL TG HMLDMYSVMLTNDNTSR YWEP EFYEAMYPHTVLQ  | 932 |            |
| SARS-CoV | NQEYADV FHLYLQYIRKLHDEL TG HMLDMYSVMLTNDNTSR YWEP EFYEAMYPHTVLQ | 932                                                              |     |            |
|          |                                                                 | . ** * : : . * . * : : : . : : ** : * : *                        |     |            |

**Figure S5, Multiple sequence alignment of coronavirus nsp12s.** Alignment of nsp12 from the alpha- (FCoV-65F, HCoV-229E, HCoV-NL63, HKU8, PEDV), beta- (HCoV-OC43, HKU1, MHV MERS, HKU4, HKU5, HKU9, SARS-CoV, SARS-CoV-2), gamma (HKU22, IBV), and delta- (HKU19, HKU11, PDCV) coronavirus genera. Global alignment was done using Clustal Omega [2]. Residues marked with “\*” are conserved, “:” are very similar, and “.” are moderately similar residues.

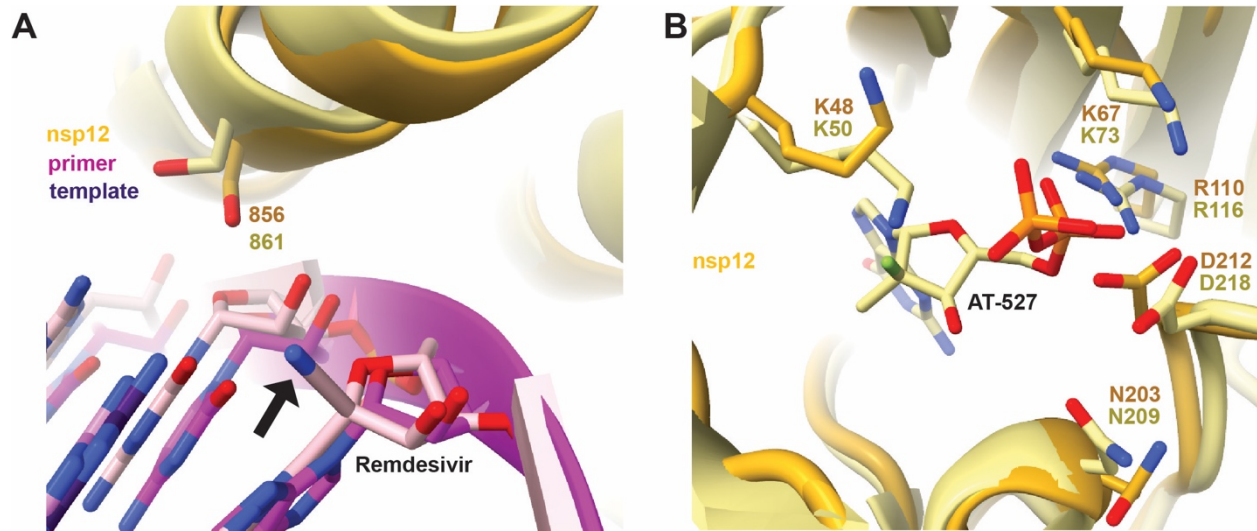

**Figure S6: possible cross-effectiveness of CoV antivirals.** In each figure PEDV nsp12 is shown in dark yellow and the RNA primer in dark pink, superimposed are SARS-CoV-2 models in lighter, matching colors. **A)** The antiviral Remdesivir's 1'-cyano group (black arrow) is believed to clash with SARS-CoV-2 nsp12 S861 in the +4 extension position. Remdesivir incorporated into a nascent primer at +3 is shown (PDB ID: 7B3C). Due to the sequence and spatial homology of S856 in PEDV we predict Remdesivir would have similar effectiveness against PEDV. **B)** The dual action antiviral AT-527 was shown to bind and inhibit the NiRAN domain of SARS-CoV-2 nsp12 (PDB ID: 7ED5). Several residues important for drug binding are conserved in PEDV, shown are K48, K67, R110, N203, and D212.

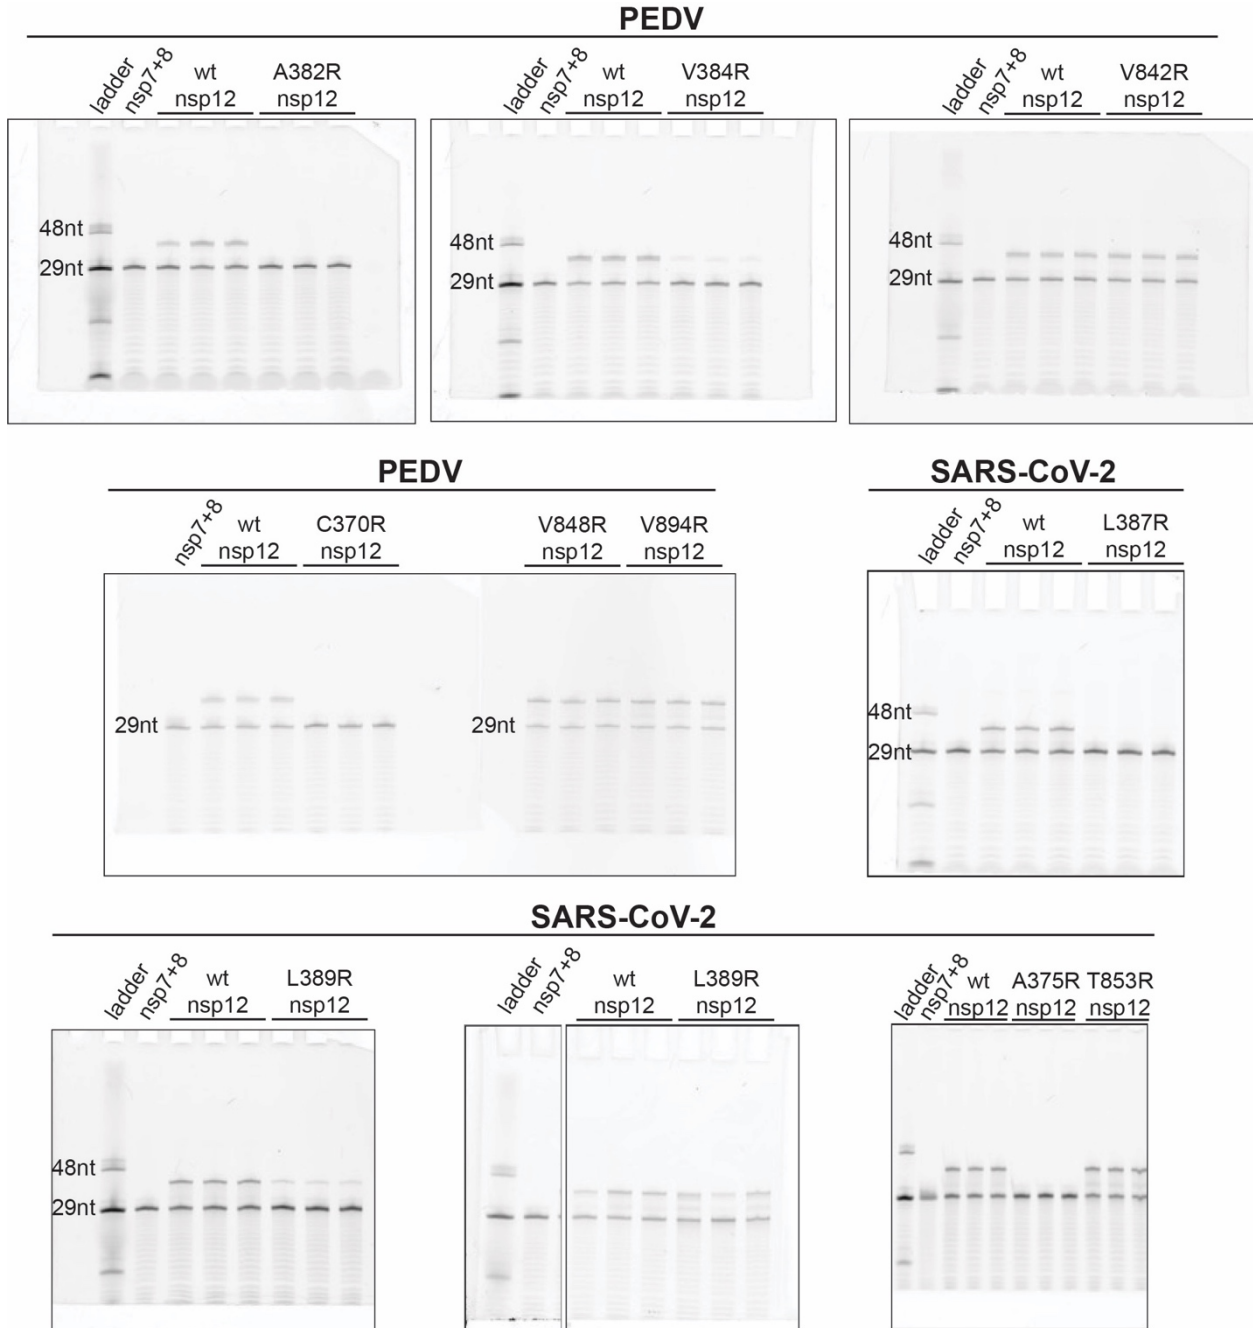

**Figure S7, full gel images for mutant nsp12 primer-extension assays:** Primer extension results for complexes with mutant nsp12s for PEDV and SARS-CoV-2. For each experiment wildtype (wt) and mutant polymerase reactions were done in triplicate. Viral cofactors, nsp7 and nsp8, were always provided in excess to nsp12 (wt or mutant). Each experiment included one negative control reaction lacking nsp12.

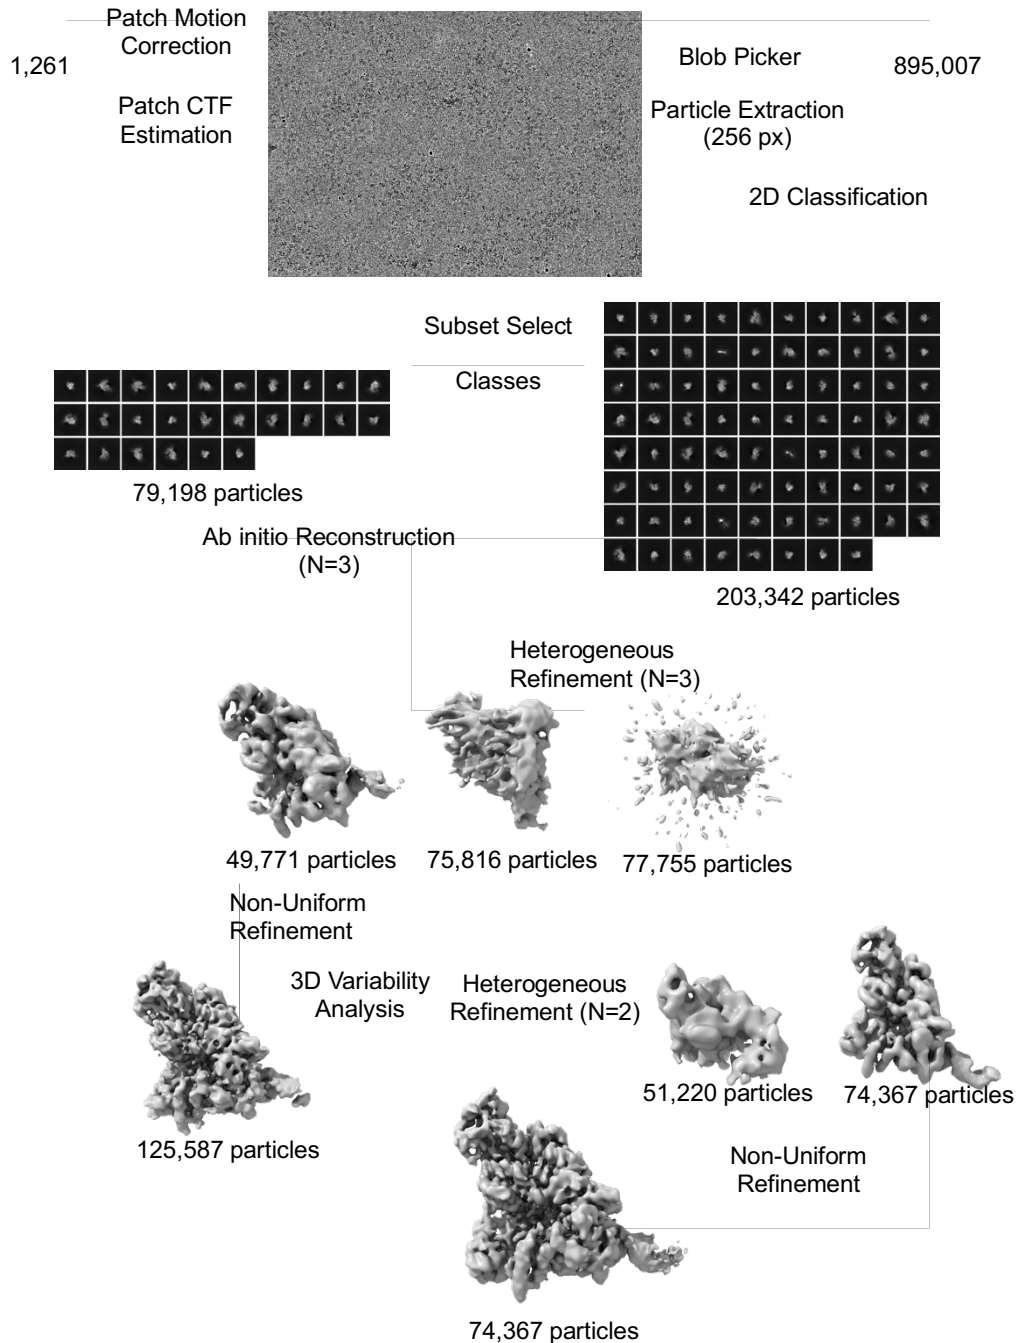

**Figure S8, cryo-EM processing pipeline:** Workflow for the processing of cryo-EM data starting with 1,261 movies. All data processing was performed in cryoSPARC [1]. Poor particles were removed through multiple rounds of 2D classification, then a subset of polymerase classes were used to generate initial models for subsequent heterogeneous refinement with all remaining particles. Particles from classes resembling polymerases were merged for further 3D refinement and a final round of heterogeneous refinement into nsp12 alone and polymerase complex maps. The complex map was further refined to our final 3.3 Å reconstruction.



**Supplemental References:**

1. Punjani, A., et al., *cryoSPARC: algorithms for rapid unsupervised cryo-EM structure determination*. Nat Methods, 2017. **14**: p. 290-296.
2. Sievers, F., et al., *Fast, scalable generation of high-quality protein multiple sequence alignments using Clustal Omega*. Mol Syst Biol, 2011. **7**: p. 539.
